# Supplementary material
Source: Research Square preprint supplement (doi:10.21203/rs.3.rs-9442446/v1)
Supplement: Supplementary file 1 [file 46ab58f79af9284f1120b3be.xlsx]

## Sheet: supplementary_file
tumor_size	treatment_response	necrosis/fibrosis	progression	B1_TP53	B1_RB1	B1_MDM2	B1_BRAF	B1_MET	B1_HSP90	B2_TP53	B2_RB1	B2_MDM2	B2_BRAF	B2_MET	B2_HSP90	B3_TP53	B3_RB1	B3_MDM2	B3_BRAF	B3_MET	B3_HSP90	B4_TP53	B4_RB1	B4_MDM2	B4_BRAF	B4_MET	B4_HSP90	B5_TP53	B5_RB1	B5_MDM2	B5_BRAF	B5_MET	B5_HSP90	B6_TP53	B6_RB1	B6_MDM2	B6_BRAF	B6_MET	B6_HSP90
3309	4	99	0	5819.147	3683.68	2402-04-01	NA	4431.093	5178.507	4163.852	0	4163.852	2271.192	3596.054	79340.8	5708.267	3254.533	5400.267	NA	NA	4486.533	NA	NA	NA	NA	NA	NA	7333.333	3971	7142.667	8448	6952	6262.667	4268	2948	4018.667	4972	4488	4238.667
242	3	96	0	6673.333	6160	6160	NA	6545	8085	11.293	646.8	3182.667	0	10.78	15.913	811.067	621.133	2700.133	NA	NA	482.533	698.133	3463.152	520.178	909.333	4617.536	441.467	7494.667	5617.333	4286.333	6277.333	3864.667	6336	NA	NA	NA	NA	NA	NA
7199	4	99.1	0	121.147	60.573	16.427	NA	70.84	68.273	4219-06-01	2073.867	3696	4424.933	3685.733	3562.533	2422.933	1160.133	1796.667	NA	1796.667	1858.267	5359-02-01	3367.467	5058.533	9122.667	6497.333	7069.333	NA	NA	NA	NA	NA	NA	824.267	NA	1399.2	1633.867	3616-08-01	745.067
194	3	92	0	2505.067	2217-06-01	1204.622	2094-04-01	56056	69197.33	74905.6	45294.48	NA	NA	NA	NA	29845.2	15800.4	28674.8	28674.8	23993.2	24578.4	4282.667	1197.504	1949-02-01	4678.667	1446.984	924	4356	2258.667	3182.667	4268	2860	3461.333	NA	NA	NA	NA	NA	NA
320	4	91.5	0	3624.133	2279-02-01	NA	NA	2782.267	2587-02-01	137984	84515.2	106506.4	102625.6	364795.2	421713.6	9773.867	4310.973	8726.667	9424-08-01	10122.93	9075.733	1408	1776.133	2443.467	1531.2	1640.467	1991.733	4341.333	3930.667	4077.333	4136	4106.667	3930.667	508933.3	473733.3	507466.7	519200	536800	539733.3
3025	2	59	1	115705.3	73909.73	10507.93	NA	37072.93	21354.67	48171.2	28336	41323.33	37781.33	106732.3	85952.53	40245.33	25461.33	36960	36960	35112	28746.67	5038	4829.44	6108.52	6424	6702-08-01	8599.36	NA	NA	NA	NA	NA	NA	NA	NA	NA	NA	NA	NA
1359	3	97.5	1	34470.33	158158	48055.7	32956	24332	33674.67	55211.67	33417.59	61749.89	49399.91	53758.73	62524	10406.29	6503.933	9012.593	10592.12	6689.76	9240	6512	1006.133	3419-09-01	5368	1925	1650.88	5390	3256	4092	5038	6028	5236	NA	NA	NA	NA	NA	NA
132	1	15	0	10061.33	5605-06-01	8695.867	8049.067	5893.067	10348.8	272734	151782.4	76214.6	63170.8	44521.4	70070	NA	NA	NA	NA	NA	NA	5368	3962.64	5338.667	4488	4288.533	5718.24	NA	NA	NA	NA	NA	NA	NA	NA	NA	NA	NA	NA
3176	2	79	1	NA	NA	NA	NA	NA	NA	20438	6642.533	18736.67	22572	12936	12525.33	NA	NA	NA	NA	NA	NA	5060	2728	4407.333	5294.667	3015.76	3608	7406.667	7744	13200	8374.667	7729.333	11953.33	410666.7	380160	374880	583733.3	393066.7	327066.7
203	2	77	0	880	308	461.267	598.4	184.8	297.733	11557.33	770	6574.333	12466.67	903.467	831.6	6182	677.6	4248.933	8008	1560.533	1714.533	4590.667	1686.667	4796	5030.667	2016.667	381.333	3901.333	3021.333	4370.667	3916	2786.667	3182.667	18480	17306.67	20430.67	18626.67	16573.33	17306.67
391	3	95	0	4136	95.48	2266.733	4026	123.2	123.2	13006.4	4188-08-01	9047.133	14379.2	6786.267	6396.133	6512	1989.988	4094.222	6864	1487.024	3471.16	10472	5793.333	16426.67	11616	8521.333	10604	317240	293186.7	280866.7	307560	323106.7	378106.7	4212.267	NA	2085-06-01	2628.267	NA	3960
2495	2	63	1	4804-08-01	1540	4182.933	6248	2453.733	2926	23936	9896-04-01	21717.96	22528	10866.24	18516.96	8286.667	4155.947	6234.36	8184	8217.44	9067.52	NA	NA	NA	NA	NA	NA	15693.33	9049.333	13537.33	16426.67	11865.33	17600	NA	NA	NA	NA	NA	NA
1195	2	82	1	4246	1550.267	3381-04-01	2422.933	1868.533	1714.533	385440	428033.8	677966.7	531300	334950	549266.7	1130800	13583.68	478243.7	14083.08	13074.6	18026.07	NA	NA	NA	NA	NA	NA	2830.667	1422.667	2229.333	2508	2009.333	2464	17160	12305.33	14256	15136	12554.67	13126.67
1134	4	99	0	10413.33	5270.496	10327.33	10501.33	5780.544	7129.173	21853.33	11091.67	18368.17	24933.33	7846.667	13071.67	7876	3146	6864	7744	3668.427	5161-02-01	10252	6248	7978.667	11102.67	8140	7700	26546.67	22000	24434.67	28453.33	23760	39160	5089.333	4356	4972	5162.667	4810.667	5573.333
157	1	12	0	110720	38518.19	70053.87	84480	45255.47	157760	6981.333	5353.333	6365.333	7128	6438.667	5734.667	4561.333	3021.333	3608	5250.667	3828	5089.333	NA	NA	NA	NA	NA	NA	9504	8286.667	8946.667	8858.667	8169.333	10310.67	199320	191400	198880	213106.7	200053.3	204453.3
565	2	67	1	6922.667	5588	7348	8550.667	7010.667	8242.667	26546.67	15840	22469.33	28600	25813.33	24053.33	12598.67	7245.333	10809.33	12848	9064	10882.67	17160	9357.333	14124	16720	12730.67	13845.33	NA	NA	NA	NA	NA	NA	4370.667	2508	3740	4576	3329.333	3784
443	5	100	0	6321.333	4488	5602.667	86973.33	5646.667	6321.333	9680	7054.667	9313.333	10574.67	6790.667	10604	5456	2874.667	4048	5925.333	4326.667	3901.333	NA	NA	NA	NA	NA	NA	NA	NA	NA	NA	NA	NA	3596.267	NA	7744	9386.667	8506.667	3443.733
364	1	5	0	18186.67	13845.33	14505.33	17306.67	16162.67	18773.33	24346.67	17893.33	17820	25666.67	18626.67	26106.67	5133.333	2478.667	3725.333	4854.667	3476	3842.667	5998.667	3666.667	5192	6130.667	5001.333	5954.667	4590.667	3432	4473.333	5236	3432	3842.667	7025.333	5324	5852	6966.667	6204	6277.333
1170	4	100	0	8330.667	4282.667	6864	8521.333	6438.667	6556	60060	32560	47520	68200	44000	54120	17893.33	13332	15840	18773.33	15840	17600	6864	4854.667	7260	7876	6952	7010.667	NA	NA	NA	NA	NA	NA	NA	NA	NA	NA	NA	NA
